# Supplementary material
Source: PubMed Central journal article supplement (PMC3322836)
Supplement: supp_M111.314229_jbc.M111.314229-2.pdf [file supp_M111.314229_jbc.M111.314229-2.pdf]

**Table S1.** Voltage gating parameters,  $V_0$  and  $n$ , of VDAC-Cys pre-treated with 0.02mM Cu-Ph prior to channel reconstitution. Before (VDAC-Cys + Cu-Ph) and 20 minutes after (VDAC-Cys + Cu-Ph + DTT) the addition of 0.1mM DTT into the membrane-surrounding buffer solutions. Data are compared with VDAC WT. Voltage-gating parameters  $V_0$ , the voltage at which half channels open, and  $n$ , the effective gating charge, were calculated from the open probability plots (Fig. S1) at positive and negative voltages. Data are means  $\pm$  STD and the numbers of experiments per condition are displayed in brackets.

|                            | Positive potentials |               | Negative potentials |               |
|----------------------------|---------------------|---------------|---------------------|---------------|
|                            | $V_0$ , mV          | $n$           | $V_0$ , mV          | $n$           |
| <b>rmVDAC</b>              |                     |               |                     |               |
| VDAC-Cys + Cu-Ph (2)       | 16.0 $\pm$ 3.8      | 3.4 $\pm$ 2.0 | 22.5 $\pm$ 6.7      | 2.6 $\pm$ 0.3 |
| VDAC-Cys + Cu-Ph + DTT (3) | 28 $\pm$ 2.1        | 4.5 $\pm$ 1.0 | 23.7 $\pm$ 5.8      | 2.3 $\pm$ 0.8 |
| VDAC WT (2)                | 37.5 $\pm$ 2.4      | 2.8 $\pm$ 0.5 | 23.8 $\pm$ 3.5      | 2.6 $\pm$ 0.2 |
