# Supplementary material
Source: PubMed Central journal article supplement (PMC3322836)
Supplement: supp_M111.314229_legend.pdf [file supp_M111.314229_legend.pdf]

**Figure S1. Reduction of the cross-linked VDAC by DTT addition to the membranesurrounding buffer solution restores the normal voltage gating.** Open probability versus applied voltage plots of VDAC-Cys, which was pre-incubated with 0.02 mM Cu-Ph prior to channels reconstitution (red triangles), followed by 20 minutes after addition of 0.1mM DTT into the membrane-surrounding buffer (green squares). Data were obtained from 3 independent experiments and compared with VDAC WT (black circles). The positive  $V_0$  are indicated for the cross-linked VDAC before (\*) and after addition of 0.1mM DTT (\*\*), and for VDAC WT (\*\*\*). Open probabilities are defined as described in Fig. 5 legend. Data are means  $\pm$  STD.
